# Supplementary material
Source: PubMed Central journal article supplement (PMC5594664)
Supplement: pnas.1705762114.st01.pdf [file pnas.1705762114.st01.pdf]

Table S1: Test Cross Progeny from  $F5^{L/+} Tfp1^{+/-}$  X  $F5^{L/L}$  Mating on the 129S1 Background and  $F5^{L/+}$  X  $F5^{L/+}$  Mating on the B6 Background

|                           | <b>129S1 Background</b><br>$F5^{L/+} Tfp1^{+/-}$ x $F5^{L/L}$ |             |                            |             | <b>B6 Background</b><br>$F5^{L/+}$ x $F5^{L/+}$ |                |                             |
|---------------------------|---------------------------------------------------------------|-------------|----------------------------|-------------|-------------------------------------------------|----------------|-----------------------------|
| <i>F5</i> Genotype        | L/+                                                           | L/+         | L/L                        | L/L         | +/+                                             | L/+            | L/L                         |
| <i>Tfpi</i> Genotype      | +/+                                                           | +/-         | +/+                        | +/-         | +/+                                             | +/+            | +/+                         |
| Expected # of Conceptuses | 25%                                                           | 25%         | 25%                        | 25%         | 25%                                             | 50%            | 25%                         |
| Observed, weaning age     | 43%<br>(76)                                                   | 42%<br>(74) | <b>9.0%</b><br><b>(27)</b> | 0.0%<br>(0) | 27.1%<br>(136)                                  | 55.8%<br>(280) | <b>17.1%</b><br><b>(86)</b> |

A ~50% reduction of live weaning age  $F5^{L/L}$  mice >N12 on the 129S1 background is observed compared to  $F5^{L/L}$  mice >N12 on the B6 background (shown in bold).
