# Supplementary material
Source: PubMed Central journal article supplement (PMC5594664)
Supplement: pnas.1705762114.st02.pdf [file pnas.1705762114.st02.pdf]

Table S2: Exomic Variants from Whole Exome Sequencing

| Chr | Pos       | SNP        | Ref | Alt | Variant type      | ENU Line | Gene           | Exon    | AA change | Validation   |
|-----|-----------|------------|-----|-----|-------------------|----------|----------------|---------|-----------|--------------|
| 2   | 70509665  | rs33889947 | G   | C   | nonsynonymous SNV | MF5L1    | <i>Erich2</i>  | exon2   | C158S     | chr2         |
| 7   | 14225894  | ---        | T   | C   | nonsynonymous SNV | MF5L1    | <i>Sult2a6</i> | exon5   | Q238R     | Not Verified |
| 7   | 15940142  | ---        | T   | C   | nonsynonymous SNV | MF5L1    | <i>Gltscr2</i> | exon6   | H254R     | ENU          |
| 7   | 85754889  | ---        | A   | T   | nonsynonymous SNV | MF5L1    | <i>Vmn2r72</i> | exon1   | D31E      | Not Verified |
| 8   | 108949251 | ---        | A   | G   | nonsynonymous SNV | MF5L1    | <i>Zfx3</i>    | exon9   | Q2311R    | Not Verified |
| 12  | 110977486 | ---        | G   | A   | nonsynonymous SNV | MF5L1    | <i>Ankrd9</i>  | exon3   | T5I       | Not Verified |
| 17  | 25722876  | ---        | T   | A   | nonsynonymous SNV | MF5L1    | <i>Chtfl8</i>  | exon13  | N541Y     | ENU          |
| 3   | 99352190  | ---        | A   | G   | nonsynonymous SNV | MF5L5    | <i>Tbx15</i>   | exon8   | N459S     | Not Verified |
| 3   | 135228816 | ---        | T   | A   | nonsynonymous SNV | MF5L5    | <i>Cenpe</i>   | exon13  | D381E     | ENU          |
| 6   | 35080128  | ---        | G   | A   | nonsynonymous SNV | MF5L5    | <i>Cnot4</i>   | exon2   | R3C       | Not Verified |
| 8   | 70913530  | ---        | A   | T   | nonsynonymous SNV | MF5L5    | <i>Map1s</i>   | exon5   | I360F     | ENU          |
| 17  | 70657633  | ---        | T   | G   | splicing          | MF5L5    | <i>Dlgap1</i>  | exon4   | c.1368+2T | ENU          |
| 1   | 82741945  | ---        | C   | A   | nonsynonymous SNV | MF5L6    | <i>Mff</i>     | exon6   | Q190K     | de novo      |
| 2   | 67516594  | ---        | A   | G   | nonsynonymous SNV | MF5L6    | <i>Xirp2</i>   | exon7   | R3060G    | chr2         |
| 2   | 76724952  | ---        | G   | A   | nonsynonymous SNV | MF5L6    | <i>Ttn</i>     | exon167 | R22243C   | chr2         |
| 2   | 76939280  | ---        | T   | A   | nonsynonymous SNV | MF5L6    | <i>Ttn</i>     | exon34  | N2675I    | chr2         |
| 2   | 88423385  | ---        | A   | T   | nonsynonymous SNV | MF5L6    | <i>Olf1181</i> | exon1   | F213L     | chr2         |
| 2   | 111537791 | ---        | A   | T   | nonsynonymous SNV | MF5L6    | <i>Olf1294</i> | exon1   | L166Q     | chr2         |
| 2   | 140120707 | ---        | T   | C   | nonsynonymous SNV | MF5L6    | <i>Esf1</i>    | exon14  | K815E     | chr2         |
| 5   | 108650355 | ---        | C   | T   | nonsynonymous SNV | MF5L6    | <i>Dgkq</i>    | exon18  | R679H     | Not ENU      |
| 7   | 79822260  | ---        | A   | C   | nonsynonymous SNV | MF5L6    | <i>Anpep</i>   | exon20  | D955E     | ENU          |
| 7   | 101990583 | ---        | A   | T   | stopgain SNV      | MF5L6    | <i>Numa1</i>   | exon4   | K47X      | ENU          |
| 1   | 33746762  | ---        | T   | G   | nonsynonymous SNV | MF5L8    | <i>Bag2</i>    | exon3   | I160L     | ENU          |
| 1   | 36163249  | ---        | T   | C   | nonsynonymous SNV | MF5L8    | <i>Uggt1</i>   | exon29  | Y1089C    | ENU          |
| 1   | 40125203  | ---        | A   | G   | nonsynonymous SNV | MF5L8    | <i>Il1r2</i>   | exon9   | N410S     | ENU          |
| 2   | 76549471  | ---        | A   | C   | nonsynonymous SNV | MF5L8    | <i>Osbpl6</i>  | exon7   | D135A     | chr2         |
| 2   | 112407616 | ---        | G   | A   | nonsynonymous SNV | MF5L8    | <i>Katnb1l</i> | exon5   | V152I     | chr2         |
| 2   | 112630022 | ---        | A   | G   | nonsynonymous SNV | MF5L8    | <i>Aven</i>    | exon4   | T162A     | chr2         |
| 2   | 153136757 | ---        | G   | A   | nonsynonymous SNV | MF5L8    | <i>Hck</i>     | exon9   | V276M     | chr2         |

|    |           |     |   |   |                      |               |                       |        |        |         |
|----|-----------|-----|---|---|----------------------|---------------|-----------------------|--------|--------|---------|
| 2  | 153225070 | --- | T | A | nonsynonymous SNV    | <i>MF5L8</i>  | <i>Tspyl3</i>         | exon1  | T83S   | chr2    |
| 9  | 123712602 | --- | T | G | nonsynonymous SNV    | <i>MF5L8</i>  | <i>Lztfl1</i>         | exon3  | I51L   | ENU     |
| 10 | 128290865 | --- | C | T | stopgain SNV         | <i>MF5L8</i>  | <i>Stat2</i>          | exon23 | Q820X  | ENU     |
| 11 | 52145503  | --- | T | C | nonsynonymous SNV    | <i>MF5L8</i>  | <i>Olfrl373</i>       | exon1  | E9G    | Not ENU |
| 11 | 69129597  | --- | A | G | nonsynonymous SNV    | <i>MF5L8</i>  | <i>Aloxe3</i>         | exon4  | M156V  | Not ENU |
| 14 | 8169757   | --- | A | G | nonsynonymous SNV    | <i>MF5L8</i>  | <i>Pdhb</i>           | exon7  | S218P  | ENU     |
| 15 | 89456795  | --- | G | T | stopgain SNV         | <i>MF5L8</i>  | <i>Mapk8ip2</i>       | exon3  | G148X  | ENU     |
| 16 | 59554543  | --- | C | T | nonsynonymous SNV    | <i>MF5L8</i>  | <i>Crybg3</i>         | exon1  | R402H  | Not ENU |
| 17 | 12271353  | --- | T | A | nonsynonymous SNV    | <i>MF5L8</i>  | <i>Map3k4</i>         | exon3  | N397I  | ENU     |
| 17 | 45416968  | --- | T | A | stopgain SNV         | <i>MF5L8</i>  | <i>Cdc5l</i>          | exon7  | K294X  | ENU     |
| 19 | 39563826  | --- | C | T | nonsynonymous SNV    | <i>MF5L8</i>  | <i>Cyp2c39</i>        | exon7  | A321V  | ENU     |
| 19 | 46065668  | --- | C | G | nonsynonymous SNV    | <i>MF5L8</i>  | <i>Pprc1</i>          | exon6  | I1150M | ENU     |
| 2  | 101696795 | --- | C | T | nonsynonymous SNV    | <i>MF5L9</i>  | <i>Traf6</i>          | exon8  | R297C  | chr2    |
| 7  | 82868974  | --- | G | A | nonsynonymous SNV    | <i>MF5L9</i>  | <i>Mex3b</i>          | exon2  | G166R  | ENU     |
| 9  | 21634876  | --- | T | C | nonsynonymous SNV    | <i>MF5L9</i>  | <i>Smarca4</i>        | exon3  | S117P  | ENU     |
| 10 | 67538372  | --- | T | C | nonsynonymous SNV    | <i>MF5L9</i>  | <i>Egr2</i>           | exon1  | M51T   | ENU     |
| 18 | 71327504  | --- | C | T | nonsynonymous SNV    | <i>MF5L9</i>  | <i>Dcc</i>            | exon24 | D1172N | de novo |
| 19 | 56810315  | --- | G | T | stopgain SNV         | <i>MF5L9</i>  | <i>A630007-B06Rik</i> | exon2  | S247X  | ENU     |
| 2  | 30086662  | --- | A | G | nonsynonymous SNV    | <i>MF5L11</i> | <i>Pkn3</i>           | exon15 | K572E  | chr2    |
| 2  | 40874986  | --- | G | T | nonsynonymous SNV    | <i>MF5L11</i> | <i>Lrp1b</i>          | exon55 | Q2943K | chr2    |
| 2  | 61804747  | --- | T | C | nonsynonymous SNV    | <i>MF5L11</i> | <i>Tbr1</i>           | exon1  | S14P   | chr2    |
| 2  | 144572561 | --- | G | A | nonsynonymous SNV    | <i>MF5L11</i> | <i>Sec23b</i>         | exon10 | G398R  | chr2    |
| 4  | 141581029 | --- | A | G | nonsynonymous SNV    | <i>MF5L11</i> | <i>Fblim1</i>         | exon8  | I323T  | ENU     |
| 5  | 123760656 | --- | T | A | stopgain SNV         | <i>MF5L11</i> | <i>Kntc1</i>          | exon8  | C204X  | ENU     |
| 5  | 136373331 | --- | T | C | nonsynonymous SNV    | <i>MF5L11</i> | <i>Cux1</i>           | exon5  | K144E  | ENU     |
| 9  | 123963447 | --- | G | T | nonsynonymous SNV    | <i>MF5L11</i> | <i>Ccr1</i>           | exon2  | H349N  | ENU     |
| 10 | 84958016  | --- | A | G | nonsynonymous SNV    | <i>MF5L11</i> | <i>Ric8b</i>          | exon4  | S248G  | ENU     |
| 11 | 57221033  | --- | A | T | nonsynonymous SNV    | <i>MF5L11</i> | <i>Grial</i>          | exon7  | T224S  | ENU     |
| 11 | 101740781 | --- | T | G | nonsynonymo(1)us SNV | <i>MF5L11</i> | <i>Dhx8</i>           | exon8  | V400G  | ENU     |
| 13 | 112368238 | --- | G | A | stopgain SNV         | <i>MF5L11</i> | <i>Ankrd55</i>        | exon9  | W506X  | ENU     |

|    |           |     |   |   |                   |               |                  |        |        |              |
|----|-----------|-----|---|---|-------------------|---------------|------------------|--------|--------|--------------|
| 14 | 32966414  | --- | A | G | nonsynonymous SNV | <i>MF5L11</i> | <i>Wdfy4</i>     | exon56 | W2921R | ENU          |
| 16 | 92605854  | --- | T | C | nonsynonymous SNV | <i>MF5L11</i> | <i>Runx1</i>     | exon8  | Y400C  | ENU          |
| 5  | 86719746  | --- | T | A | nonsynonymous SNV | <i>MF5L12</i> | <i>Tmprss11e</i> | exon5  | D155V  | ENU          |
| 6  | 129517379 | --- | A | G | nonsynonymous SNV | <i>MF5L12</i> | <i>Tmem52b</i>   | exon5  | E182G  | ENU          |
| 6  | 148237808 | --- | G | A | nonsynonymous SNV | <i>MF5L12</i> | <i>Tmtc1</i>     | exon20 | R939W  | ENU          |
| 7  | 141620530 | --- | G | A | nonsynonymous SNV | <i>MF5L12</i> | <i>Ap2a2</i>     | exon12 | G504E  | ENU          |
| 11 | 20077297  | --- | G | C | nonsynonymous SNV | <i>MF5L12</i> | <i>Actr2</i>     | exon7  | R258G  | ENU          |
| 11 | 67921730  | --- | C | T | nonsynonymous SNV | <i>MF5L12</i> | <i>Usp43</i>     | exon1  | G107S  | ENU          |
| 13 | 100285719 | --- | C | T | nonsynonymous SNV | <i>MF5L12</i> | <i>Naip7</i>     | exon14 | A1269T | Not Verified |
| 6  | 36523684  | --- | A | G | nonsynonymous SNV | <i>MF5L16</i> | <i>Chrm2</i>     | exon3  | I159V  | ENU          |
| 8  | 70259804  | --- | G | A | nonsynonymous SNV | <i>MF5L16</i> | <i>Sugp2</i>     | exon9  | R1023Q | ENU          |
| 10 | 77260815  | --- | T | C | nonsynonymous SNV | <i>MF5L16</i> | <i>Pofut2</i>    | exon2  | F125L  | ENU          |
| 10 | 114800967 | --- | T | C | nonsynonymous SNV | <i>MF5L16</i> | <i>Trhde</i>     | exon1  | S112G  | ENU          |
| 10 | 117278121 | --- | T | C | stoploss SNV      | <i>MF5L16</i> | <i>Lyz2</i>      | exon4  | X149W  | ENU          |
| 11 | 60710357  | --- | G | A | nonsynonymous SNV | <i>MF5L16</i> | <i>Llg11</i>     | exon16 | R707H  | Introduced   |
| 13 | 34896062  | --- | T | A | stopgain SNV      | <i>MF5L16</i> | <i>Prpf4b</i>    | exon11 | L803X  | Introduced   |
| 13 | 61568333  | --- | A | T | nonsynonymous SNV | <i>MF5L16</i> | <i>Cts3</i>      | exon3  | H71Q   | ENU          |
| 13 | 90898831  | --- | G | A | nonsynonymous SNV | <i>MF5L16</i> | <i>Atp6ap11</i>  | exon4  | P76S   | ENU          |
| 13 | 94443934  | --- | G | A | nonsynonymous SNV | <i>MF5L16</i> | <i>Ap3b1</i>     | exon9  | A321T  | ENU          |
| 15 | 6786636   | --- | C | T | stopgain SNV      | <i>MF5L16</i> | <i>Rictor</i>    | exon31 | R1130X | ENU          |
