# Supplementary material
Source: PubMed Central journal article supplement (PMC5594664)
Supplement: pnas.1705762114.st03.pdf [file pnas.1705762114.st03.pdf]

Table S3: Whole Exome Sequencing Data of *MF5L* Lines

| <b>Line</b>    | <b>Whole Exome</b> |               | <b>Agilent Capture Region</b> |               |               |                      |                          |
|----------------|--------------------|---------------|-------------------------------|---------------|---------------|----------------------|--------------------------|
|                | # of Reads         | Mapped %      | # of Reads                    | Mapped %      | Mean Coverage | % bp Covered at >=6X | Mapping Quality (max 60) |
| <i>MF5L1</i>   | 97388058           | 91.06%        | 43177469                      | 44.34%        | 73.88         | >97%                 | 34.42                    |
| <i>MF5L5</i>   | 110246719          | 93.07%        | 52837528                      | 47.93%        | 89.9          | >97%                 | 34.36                    |
| <i>MF5L6</i>   | 133205717          | 86.03%        | 56688221                      | 42.56%        | 93.93         | >97%                 | 33.89                    |
| <i>MF5L8</i>   | 128521513          | 96.48%        | 61950221                      | 48.20%        | 105.88        | >98%                 | 34.69                    |
| <i>MF5L9</i>   | 109882856          | 94.18%        | 55469742                      | 50.48%        | 95.56         | >97%                 | 34.67                    |
| <i>MF5L11</i>  | 110448223          | 96.38%        | 54907249                      | 49.71%        | 93.22         | >97%                 | 35.08                    |
| <i>MF5L12</i>  | 105612822          | 94.27%        | 50684794                      | 47.99%        | 87.28         | >97%                 | 34.68                    |
| <i>MF5L16</i>  | 115987369          | 90.33%        | 63608463                      | 49.54%        | 110.83        | >98%                 | 34.26                    |
| <b>Average</b> | <b>113911660</b>   | <b>92.73%</b> | <b>54915461</b>               | <b>47.59%</b> | <b>93.81</b>  | <b>&gt;97%</b>       | <b>34.51</b>             |
