# Supplementary material
Source: PubMed Central journal article supplement (PMC5594664)
Supplement: pnas.1705762114.st04.pdf [file pnas.1705762114.st04.pdf]

Table S4: Sequences of Oligonucleotides Used as HDR Donor Templates and for Cloning sgRNA Expression Vectors

| Template Name      | Sequence (5' to 3')                                                                                                                                                                    |
|--------------------|----------------------------------------------------------------------------------------------------------------------------------------------------------------------------------------|
| sgRNA #1 Forward   | CACCGAGAACGATTTGAAGCACCAG                                                                                                                                                              |
| sgRNA #1 Reverse   | AAACCTGGTGCTTCAAATCGTTCTC                                                                                                                                                              |
| sgRNA #1 HDR Donor | CAGAGAAGTTGTGGTTTTGCTGACACCTGGTTATTTCTTTCTAG<br>CTTCCAGATGGACGTATCATTAAGGTTGGAGGAGAAGGATTTG<br>AAGCACCAGAA <u>AG</u> CCTTATTTTCAGCCTCATTGATCAATGTCGAG<br>GGGGTTGGTGTGCTGAACTGCTTTTTAAC |
| sgRNA #2 Forward   | CACCGTCCAGATGGACGTATCATTA                                                                                                                                                              |
| sgRNA #2 Reverse   | AAACTAATGATACGTCCATCTGGAC                                                                                                                                                              |
| sgRNA #2 HDR Donor | CAGAGAAGTTGTGGTTTTGCTGACACCTGGTTATTTCTTTCTAG<br>CTTCCAGATGGACGTATCATTA <u>AG</u> GTTGGAGGAGAAGGATTTG<br>AAGCACCAGAGGCTTATTTTCAGCCTCATTGATCAATGTCGAG<br>GGGGTTGGTGTGCTGAACTGCTTTTTAAC   |

Changes in template are underlined
