# Supplementary material
Source: PubMed Central journal article supplement (PMC5594664)
Supplement: pnas.1705762114.st05.pdf [file pnas.1705762114.st05.pdf]

Table S5: Genotyping and Sanger Sequencing Primers

| PRIMER NAME     | PRIMER SEQ 5'->3'      |
|-----------------|------------------------|
| F3_genotyping_F | ctcccatttcttttctctc    |
| F3_genotyping_R | ggggcgtttgtaaattggcgg  |
| F3-Neo          | cctgactaggggaggagtag   |
| F3-exon-F       | tgettctcgaccacagacac   |
| F3-exon-R       | ctgcttctgggctattttg    |
| upstreamF3_1F   | gacacgccatctgtccagta   |
| upstreamF3_1R   | caaaaaggtgggcagctaag   |
| upstreamF3_2F   | agcagctctgcaactcact    |
| upstreamF3_2R   | gcacagagggaagcaagg     |
| upstreamF3_3F   | cacaggggcctttattttga   |
| upstreamF3_3R   | aaagtagggcaggggaaaaa   |
| upstreamF3_4F   | accatctttgaagcccagaa   |
| upstreamF3_4R   | aggatggagcagaactgagg   |
| upstreamF3_5F   | ctgtctgggaaacctgtgt    |
| upstreamF3_5R   | catgcaccactgcacctatc   |
| upstreamF3_6F   | ccaggacagcctcgaactta   |
| upstreamF3_6R   | agaaaatggctgctgtgctt   |
| upstreamF3_7F   | tggcctagcaactgtattttga |
| upstreamF3_7R   | cagaagctgctcagtcagtg   |
| upstreamF3_8F   | gtcctttctgggaagaca     |
| upstreamF3_8R   | cagttacaagcaccaggag    |
| upstreamF3_9F   | gcttcagcgacaagagttca   |
| upstreamF3_9R   | actcccaactgagcaaggga   |
| upstreamF3_10F  | tcttcacgcatgtctgcttt   |
| upstreamF3_10R  | tgctttgtacaatcttcttcc  |
| upstreamF3_11F  | tgagtgggacgacagcttag   |
| upstreamF3_11R  | cacttgcaagctttgggttt   |
| upstreamF3_12F  | tgtcagcaaatgctaccag    |
| upstreamF3_12R  | gcagtggttagcagatcattc  |
| upstreamF3_13F  | tctcaggttcatgttgcag    |
| upstreamF3_13R  | cccctctgtaggaaactcc    |
| F3gene_1F       | ggtctccgagctacctggat   |
| F3gene_1R       | ttctcaggaccaatgccact   |
| F3gene_2F       | gctctgtagcgtagccaac    |
| F3gene_2R       | cttcaagggcccaacatcta   |
| F3gene_3F       | gccctgaggatttgaatgaa   |
| F3gene_3R       | tgtcacatggtgggatgcta   |
| F3gene_4F       | tcaggcaagacagagtgcac   |
| F3gene_4R       | catactgcaatccgtggaaa   |
| F3gene_5F       | acgtgtgtggggactagc     |
| F3gene_5R       | cgctttctctggaatgcta    |
| F3gene_6F       | cacacctctgctcttgaca    |

|            |                       |
|------------|-----------------------|
| F3gene_6R  | ttaggatggcctggaactc   |
| F3gene_7F  | gccagggttaaaccaggca   |
| F3gene_7R  | cactgcttcagggcagtga   |
| F3gene_8F  | cactgtggtcactgtgtgct  |
| F3gene_8R  | gaaacaaaagcttgccaaa   |
| F3gene_9F  | ccaatgcccttttctggta   |
| F3gene_9R  | gcatgcatgaacacacacac  |
| F3gene_10F | gacagctctcgggaacaagt  |
| F3gene_10R | caagctgtgcagggattaca  |
| F3gene_11F | tggtgatgcaggtcagttgt  |
| F3gene_11R | tgcttgactaatggcaatg   |
| F3gene_12F | aaggtggtcaccattgaggt  |
| F3gene_12R | tatggactggatggacagca  |
| F3gene_13F | tcacactgactgctgggtggt |
| F3gene_13R | gggctctgggtgaagtacata |
| F3gene_14F | tgctgtccatccagtcacata |
| F3gene_14R | acattcagcaggggagtcac  |
| F3gene_15F | tgggtcaaacaaaactgc    |
| F3gene_15R | aaagaaccagcacctcctt   |
| F3gene_16F | tttgtgcctcttctgtgtgg  |
| F3gene_16R | tctgcttagcgtcttctcc   |
| F3gene_17F | attctgctgggctctttgaa  |
| F3gene_17R | gagctgggtttgtttgcttc  |
| F3gene_18F | ggagatctggaactcgcttg  |
| F3gene_18R | tgctgtggtcgagaagcac   |
| F3gene_19F | tcggaggctcagactttgtt  |
| F3gene_19R | taaaaactttggggcgtttg  |
| F3gene_20F | tcccgtttctttcctcctt   |
| F3gene_20R | cccctggtctgatgaaagaa  |
| F3gene_21F | cacacacaccaaggagatgc  |
| F3gene_21R | aggggacagatggggattac  |
| F3gene_22F | gtgtgtgagcctgccatcta  |
| F3gene_22R | acacatcccacaccaatct   |
| F3gene_23F | ggatgaagggaattgagaa   |
| F3gene_23R | atgcattagaggctgggaag  |
| F3gene_24F | agattgggtgtgggatgtgt  |
| F3gene_24R | tggtgacggtctttagctg   |
| F3gene_25F | cctgtagccatcactcaca   |
| F3gene_25R | gcatgctgtggagaatcaaa  |
| F3gene_26F | catctgcaagggaagggtctc |
| F3gene_26R | ggggtcccaatatgaagat   |
| F3gene_27F | caagcacgggaaagtaaga   |
| F3gene_27R | attgacgcacgagggattag  |
| F3gene_28F | gtatgtgcttgcgtgtgtga  |
| F3gene_28R | ggaagtgaccaagggaacaa  |

|            |                       |
|------------|-----------------------|
| F3gene_29F | caaaatagcccaggaagcag  |
| F3gene_29R | gctactgcccccttagtcgt  |
| F3gene_30F | ttgtcccttggtcacttc    |
| F3gene_30R | atgcccttggtctctttct   |
| F3gene_31F | tagctatggcctggctctgt  |
| F3gene_31R | tgatggtggagacgaagaga  |
| F3gene_32F | ttctgccttcttgctctgt   |
| F3gene_32R | accactgctcccacaatgat  |
| F3gene_33F | ccccagccaactactgtctc  |
| F3gene_33R | atgttgcacagtcccatca   |
| F3gene_34F | cgagcctccatgttgacttt  |
| F3gene_34R | aatcacaaagatgccccaaag |
| F3gene_35F | ccagctaacgctttgattcc  |
| F3gene_35R | ttgtctcaattcccacacc   |
| MFF_OF     | cactcattgctgggtccttt  |
| MFF_OR     | attccaagtgaaccaagc    |
| MFF_IF     | ccctctgctcggattgatac  |
| MFF_IR     | tatgcaacaaagtggcaagg  |
| DGKQ_OF    | tgccaactgtgccagac     |
| DGKQ_OR    | ccacacaggtccaccttt    |
| DGKQ_IF    | ccacaggctcagtaacaa    |
| DGKQ_IR    | acaggtgggcttagtcatcg  |
| ANPEP_OF   | tagcttcagagctgggcttc  |
| ANPEP_OR   | gggctgtggttcacaactt   |
| ANPEP_IF   | ctccagaggctggagacttc  |
| ANPEP_IR   | ggtgagcacttaaccccaa   |
| NUMA1_OF   | tcccaacattttgccattt   |
| NUMA1_OR   | tttcttgaagggaaagga    |
| NUMA1_IF   | cttaccgccacacatttc    |
| NUMA1_IR   | ctggacctgacacggactct  |
| BAG2_OF    | ctgtgtctgccaacactgga  |
| BAG2_OR    | gttgctgacgtgggaagttt  |
| BAG2_IF    | ccggtgaattgaaggctaa   |
| BAG2_IR    | gactgccaaccgtctgatg   |
| UGGT1_OF   | tccctagcactgcttctgt   |
| UGGT1_OR   | gcagaaggcttggttattg   |
| UGGT1_IF   | cgggaaggcatctgaataaa  |
| UGGT1_IR   | gacgctgagactgcatcaag  |
| IL1R2_OF   | ccacctaaccaagcctcta   |
| IL1R2_OR   | ggctgctatggcttgttctc  |
| IL1R2_IF   | gtcaacctatggtgccctgt  |
| IL1R2_IR   | cctccacattttctcccaga  |
| LZTFL1_OF  | tgagtgctcctcaaggaagg  |
| LZTFL1_OR  | cagaaagtgggggagtaagtg |
| LZTFL1_IF  | agtgactgtgccttgcctgtt |

|             |                        |
|-------------|------------------------|
| LZTFL1_IR   | tgatcatgatgctggctcttg  |
| STAT2_OF    | tgccattgtctgtccttg     |
| STAT2_OR    | gcccttgcaatttcctatcaa  |
| STAT2_IF    | gaccaggagtggcattgat    |
| STAT2_IR    | aggtcctcaggcaaatctga   |
| OLFR1373_OF | cagggtgcataatgggttg    |
| OLFR1373_OR | acaccagggccaagaagt     |
| OLFR1373_IF | cacctccaagctgatggt     |
| OLFR1373_IR | gggggagggtataggaact    |
| ALOXE3_OF   | aatcgggtgctgggatctatg  |
| ALOXE3_OR   | aagtctcaacctgcccttt    |
| ALOXE3_IF   | tgaggcttagggatggctta   |
| ALOXE3_IR   | catctcaacacacgggtggtc  |
| PDHB_OF     | actggtcttgaatgggcaac   |
| PDHB_OR     | ggggcatctagttaggctta   |
| PDHB_IF     | ggcagctatggcctgtetta   |
| PDHB_IR     | ctgcatacctgcacattgg    |
| MAPK8IP2_OF | gcagccacacctatttgtt    |
| MAPK8IP2_OR | tacttcatggcgtctctt     |
| MAPK8IP2_IF | acaggcacttgctggagact   |
| MAPK8IP2_IR | cagagcaggagttgggtta    |
| CRYBG3_OF   | tgagtcttggaaagtctgcaa  |
| CRYBG3_OR   | gtctctctgtttcccgaca    |
| CRYBG3_IF   | actggaggtcgttggttcac   |
| CRYBG3_IR   | tgaggcatttgatggagaca   |
| MAP3K4_OF   | cttcagtgtttgtccacga    |
| MAP3K4_OR   | cctcaggagacaaacctgtt   |
| MAP3K4_IF   | tcctctgactcgagcctctc   |
| MAP3K4_IR   | agcaggtgaagcggataatg   |
| CDC5L_OF    | caagaactgccaccactga    |
| CDC5L_OR    | gcctccatttatcttttctgc  |
| CDC5L_IF    | accgtgttagtgcctcat     |
| CDC5L_IR    | tgctgtgtgtaatcttttctg  |
| CYP2C39_OF  | gacaacagggcagatggagt   |
| CYP2C39_OR  | ctgccctctggaccataaag   |
| CYP2C39_IF  | aacactagtacctaaccaagga |
| CYP2C39_IR  | cacgggggtatgtttaggg    |
| PPRC1_OF    | gaccaggagaacagaccaa    |
| PPRC1_OR    | cctgcacctctcttctc      |
| PPRC1_IF    | tggtgcaaagctacctgtg    |
| PPRC1_IR    | aaaggaggcacagacgagaa   |
| MEX3B_OF    | cctggctccagggtgtaa     |
| MEX3B_OR    | gttgcgatagctggagaagg   |
| MEX3B_IF    | ggaggagcctgtctttgtg    |
| MEX3B_IR    | agatcaaagcccacgtctgt   |

|                  |                       |
|------------------|-----------------------|
| SMARCA4_OF       | tggtgagtgccctcagagcta |
| SMARCA4_OR       | tgaaccccaggacctagtga  |
| SMARCA4_IF       | tctgtgtggccccctttctc  |
| SMARCA4_IR       | ttgctagcctccaggctcta  |
| EGR2_OF          | ggagggcaaaaggagataacc |
| EGR2_OR          | ctagcccagtagcgcagagt  |
| EGR2_IF          | agttgggtctccaggttg    |
| EGR2_IR          | gcttcaaggaccaggagatg  |
| DCC_OF           | gaaggaaggcaacaggatga  |
| DCC_OR           | ctggggattcatctcagcat  |
| DCC_IF           | ctttctcaccccaaagcaa   |
| DCC_IR           | ggaaagacagccaggacaag  |
| A630007B06RIK_OF | agtgccaaagtgtcccaaag  |
| A630007B06RIK_OR | tcgtctgcttgcttctcttg  |
| A630007B06RIK_IF | ttgggcagaaaatgtgcta   |
| A630007B06RIK_IR | cagtcactcgatggtgagga  |
| FBLIM1_OF        | tggtccagttgccacctat   |
| FBLIM1_OR        | gcacaatgggtagctggatt  |
| FBLIM1_IF        | ggctcgcacacctatgtttt  |
| FBLIM1_IR        | accctgtcgggaagagtag   |
| KNTC1_OF         | gccattgagaacacggactt  |
| KNTC1_OR         | tgatttatgggagggtgcat  |
| KNTC1_IF         | tcagccaagaaggtaaagcaa |
| KNTC1_IR         | tcategagcctctagccttt  |
| CUX1_OF          | gaccctttgatcaggagctg  |
| CUX1_OR          | ggcttgcttagaattcacca  |
| CUX1_IF          | ggcgacacatcagctttga   |
| CUX1_IR          | gtgcagcgtctacacgacat  |
| CCR1_OF          | ggaatgccccattttgtta   |
| CCR1_OR          | tgctatgcagggatcatcag  |
| CCR1_IF          | gaccttcttggttgacacc   |
| CCR1_IR          | ctgctcagaagaccagtg    |
| RIC8B_OF         | gaacagaagaaccgggactg  |
| RIC8B_OR         | gcctgggagctactctcaaa  |
| RIC8B_IF         | ccctgaatggaatggagaga  |
| RIC8B_IR         | acaaatgcccgaagtctgacc |
| GRIA1_OF         | gaaggccaactgattttcca  |
| GRIA1_OR         | tggeatcacattttcatggt  |
| GRIA1_IF         | agctgatttgctggactggt  |
| GRIA1_IR         | gtcccacgtttgacttgat   |
| DHX8_OF          | cagtgtctctgtgtgcttt   |
| DHX8_OR          | cttcccttgccaccacag    |
| DHX8_IF          | accagacagaccactcac    |
| DHX8_IR          | ccatggaaactgtctctgc   |
| ANKRD55_OF       | ccaccttgacagtgctgtg   |

|            |                         |
|------------|-------------------------|
| ANKRD55_OR | cagcccattcagggtagaaa    |
| ANKRD55_IF | ccaccaatcagaaccagag     |
| ANKRD55_IR | tggtctgtagttcccgtttt    |
| WDFY4_OF   | cacacacacacatgcttgc     |
| WDFY4_OR   | ccccacacacacactgta      |
| WDFY4_IF   | ggcttgcaccacaataact     |
| WDFY4_IR   | gggcactttggtgtaccact    |
| RUNX1_OF   | agtttcctccgggattctt     |
| RUNX1_OR   | ggcagtctaggaagcctgtg    |
| RUNX1_IF   | gatggcgctcagctcagtag    |
| RUNX1_IR   | ctactctgccgtccatctcc    |
| SULT2A6_OF | tgagggcttctggcaatagtc   |
| SULT2A6_OR | gagctctctgtttcgcctca    |
| SULT2A6_IF | gaggccttgggctttagcataca |
| SULT2A6_IR | tgagctggatctcgtcctcaa   |
| GLTSCR2_OF | gaggtgagagtttggggta     |
| GLTSCR2_OR | aaactgtgagatgggctggt    |
| GLTSCR2_IF | agggatgtccctctgatcct    |
| GLTSCR2_IR | gtggttcttggcatggagtt    |
| ANKRD9_OF  | cacaagcgcatagagcagag    |
| ANKRD9_OR  | tagagttggggctggatttg    |
| ANKRD9_IF  | caggtagaaggcgaaggatg    |
| ANKRD9_IR  | ttgtgctgtgagcctgagtc    |
| CHTF18_OF  | ccaagtcaggaccctaccaa    |
| CHTF18_OR  | tgtattgagctgtcgggttg    |
| CHTF18_IF  | ctggcccactcatatcact     |
| CHTF18_IR  | gttgctctgaggatgtgct     |
| TBX15_OF   | cttttcagggggcagtaca     |
| TBX15_OR   | ggcccattagaaggagaag     |
| TBX15_IF   | caacatggctgccttacaga    |
| TBX15_IR   | gagacgcgctcagttctct     |
| CENPE_OF   | ggcaatcggcagattcat      |
| CENPE_OR   | ttaccgacagccttaccg      |
| CENPE_IF   | gctactttcaagtttgcgcatt  |
| CENPE_IR   | agcctagagagttggagagtg   |
| CNOT4_OF   | ggctctcaatccactgctct    |
| CNOT4_OR   | agccatcccattgatctcag    |
| CNOT4_IF   | aagcccattctcatcagtgc    |
| CNOT4_IR   | aaccctttacatctcttgcac   |
| MAP1S_OF   | tgcaacggctttacagtgc     |
| MAP1S_OR   | cagactgtcttggctgttgg    |
| MAP1S_IF   | caacccaagtcgagcttct     |
| MAP1S_IR   | gcggccaggaaatagtacac    |
| DLGAP1_OF  | tgccctgggtgtaaaagtcc    |
| DLGAP1_OR  | ttttgtcagtggggtctcc     |

|              |                        |
|--------------|------------------------|
| DLGAP1_IF    | ccaaacgcttccattgttct   |
| DLGAP1_IR    | caaagagcccttctctct     |
| TMPRSS11E_OF | tgaaagcctgcatgaaagaa   |
| TMPRSS11E_OR | agacgagacagtgggtctgg   |
| TMPRSS11E_IF | tcagcaaataaagggaaga    |
| TMPRSS11E_IR | tgtgctcgacagtgtctgct   |
| TMEM52B_OF   | ggatcacctttgggtgtga    |
| TMEM52B_OR   | tgcattgctgtagtgaaggaa  |
| TMEM52B_IF   | ctcatgcacacagctccttg   |
| TMEM52B_IR   | ccttaatgttccatgctttgg  |
| TMTC_OF      | tatctgctgccaaagcactg   |
| TMTC_OR      | tgccattgaaccttatgctg   |
| TMTC_IF      | cagtgtgctctctctgctg    |
| TMTC_IR      | gattccttaggggagccttg   |
| AP2A2_OF     | gagtggcctactggctgttc   |
| AP2A2_OR     | tgcacaagtggaactggag    |
| AP2A2_IF     | atggcttgcgaaggcttta    |
| AP2A2_IR     | ctcatctgtccatgtgctg    |
| ACTR2_OF     | ataaatgcaggctcccacaa   |
| ACTR2_OR     | ccggttggttggttttaag    |
| ACTR2_IF     | ctgtggcctatccgtgtctt   |
| ACTR2_IR     | agcttttgggggtcagtttt   |
| ACTR2_MUT-R  | atcattaaggrrggaggagaag |
| ACTR2_WT-R   | atcattaaggttggaggagaac |
| USP43_OF     | catgtcacctcgaacaaagg   |
| USP43_OR     | tgcttaaccgcttctgcta    |
| USP43_IF     | tggttcacacgcttttcaag   |
| USP43_IR     | ctacgatggcgatggagaag   |
| LYZ2_OF      | agcatccctcttgagcatcc   |
| LYZ2_OR      | cagaggtgtctgtgtggtga   |
| LYZ2_IF      | aggcagagcatcaaactgcc   |
| LYZ2_IR      | agggctgtgctgactgaca    |
